# Supplementary material for: Is There a Similarity in Serum Cytokine Profile between Patients with Periodontitis or 2019-Novel Coronavirus Infection?—A Scoping Review
Source: MDPI journal article supplement (doi:10.3390/biology12040550), 2023-04-04
Supplement: s1 [file s1]

**Supplementary table S1 : Search keywords**

|                                                                   |                                                                                                                                                                                                                                                                                                                                                                                                                                                                                                                                                                                                                                                                                                                                                                                                                                                                                                                                                                                                                                                                                                                                                                                                                                                                                                                           |
|-------------------------------------------------------------------|---------------------------------------------------------------------------------------------------------------------------------------------------------------------------------------------------------------------------------------------------------------------------------------------------------------------------------------------------------------------------------------------------------------------------------------------------------------------------------------------------------------------------------------------------------------------------------------------------------------------------------------------------------------------------------------------------------------------------------------------------------------------------------------------------------------------------------------------------------------------------------------------------------------------------------------------------------------------------------------------------------------------------------------------------------------------------------------------------------------------------------------------------------------------------------------------------------------------------------------------------------------------------------------------------------------------------|
| <p>Covid-19 infection<br/>AND IL-1beta AND IL-6 AND TNF-alpha</p> | <p>(((((severe acute respiratory syndrome OR SARS OR SARS-CoV OR SARS CoV OR novel coronavirus OR nCoV OR 2019-nCoV OR COVID OR SARS-CoV-2 OR COVID-19 OR Wuhan) OR severe acute respiratory syndrome coronavirus 2/) AND ("tumor necrosis factor inhibitor"[All Fields] OR "TNF inhibitor"[All Fields] OR "tumor necrosis factor inhibitor"[All Fields] OR "tumor necrosis factor-alpha inhibitor"[All Fields] OR "TNF-alpha inhibitor"[All Fields] OR "TNF" [All Fields] OR "TNF-<math>\alpha</math>" [All Fields]))) AND (IL-6 OR cytokine OR interleukin OR macrophage activation syndrome OR hemophagocytic lymphohistiocytosis OR HLH) OR exp Cytokines/ OR exp cytokine/ OR exp Interleukins/ OR exp Interleukin-6/ OR exp interleukin 6/ OR exp Receptors, Interleukin-6/ OR exp Macrophage Activation Syndrome/ OR exp Lymphohistiocytosis, Hemophagocytic/ OR exp hemophagocytic syndrome/)) AND (((("interleukin 1"[MeSH Terms] OR "interleukin 1"[All Fields] OR "il 1"[All Fields]) OR ("IL-1B"[All Fields] OR ("interleukin 1beta"[MeSH Terms] OR "interleukin 1beta"[All Fields] OR "il 1 beta"[All Fields]) OR ("interleukin 1beta"[MeSH Terms] OR "interleukin 1beta"[All Fields] OR ("interleukin"[All Fields] OR "1beta"[All Fields]) OR "interleukin 1beta"[All Fields])) OR "IL1B"[All Fields]))</p> |
| <p>Periodontitis AND IL-1beta AND</p>                             | <p>((((((((((aggressive periodontitis) OR chronic periodontitis) OR periapical periodontitis) OR gingivitis) OR periodontitis) OR periodontal disease)) AND (((Tumor necrosis factor) OR TNF-</p>                                                                                                                                                                                                                                                                                                                                                                                                                                                                                                                                                                                                                                                                                                                                                                                                                                                                                                                                                                                                                                                                                                                         |

|                                                |                                                                                                                                                                                                                                                   |
|------------------------------------------------|---------------------------------------------------------------------------------------------------------------------------------------------------------------------------------------------------------------------------------------------------|
| IL-6 AND TNF-alpha                             | alpha) OR Tumor necrosis factor - alpha) OR TNF- $\alpha$ ) AND (((IL-6) OR Interleukin-6) OR Interleukin-6 receptor) OR IL-6R)) AND ((((((Interleukin-1) OR IL-1) OR Interleukin-1B) OR IL-1B) OR IL-1 beta) OR Interleukin-1 $\beta$ ) OR IL1B) |
| Association between periodontitis and covid-19 | (Periodontitis) AND (covid-19)                                                                                                                                                                                                                    |

**Supplementary table S2** : Excluded studies in periodontitis.

| S.No | No: of studies | Reason for exclusion                             |
|------|----------------|--------------------------------------------------|
| 1    | 18             | Review articles                                  |
| 2    | 6              | Systematic reviews                               |
| 3    | 98             | In vitro studies                                 |
| 4    | 21             | Cytokine sampling in GCF                         |
| 5    | 13             | Periimplantitis                                  |
| 6    | 39             | Animal studies                                   |
| 7    | 1              | Report and guidelines                            |
| 8    | 15             | Cytokine sampling in saliva                      |
| 9    | 6              | Cytokine sampling in periapical tissues / fluids |
| 10   | 10             | Cytokine sampling in gingival tissue             |
| 11   | 8              | Article in languages other than English          |

|    |    |                                                                               |
|----|----|-------------------------------------------------------------------------------|
| 12 | 3  | Cytokine sampling in subgingival plaque                                       |
| 13 | 16 | In vitro analysis using human samples                                         |
| 14 | 1  | Study protocol registration                                                   |
| 15 | 11 | No controls included in study design                                          |
| 16 | 36 | Periodontitis along with other systemic conditions                            |
| 18 | 1  | Combined orthodontic-periodontic treatment for patients<br>with periodontitis |
| 19 | 3  | Pregnant women                                                                |
